# Supplementary material
Source: PubMed Central journal article supplement (PMC2755702)

**Figure S1: Electron tomography of PAN (A)** A conventional transmission electron micrograph of a region used for recording a tilt series and for calculating the reconstruction volume shown in (B).

**(B)** A tomographic x-y slice correspond to a central section through negatively-stained PAN complexes, 1.2 nm in thickness.

**Figure S2: The C-termini of model AAA+ regulatory complexes are located in the periphery of the ATPase ring and project out of the ring-plane upon association with the protease.**

**(A)** Cartoon illustrating the state of the *E. coli* ATPase complex HslU (in the non-associated state and upon association with HslV), as portrayed in (B).

**(B)** Surface rendering of bottom and side views of HslU illustrating the position and structural transition of the C-terminal residues (430-443) upon association with the protease. Left, in the non-associated state and right, upon association with HslV.

**(C)** Surface rendering of bottom (left) and side (right) of the C-terminal domain of p97 (301-759). The ten C-terminal residues (depicted in color) are localized on the perimeter of a cavity similar to that found in the C-terminal ring of PAN.

**Figure S3: Upon association with the regulatory complex, the meshed N-terminal tails of proteasome  $\square$ -ring dissociates and projects into the proteasome regulatory complex.**

**(A)** Cartoon illustrating the state of the yeast 20S proteasome (in the non-associated state and upon association with PA-26), as portrayed in (B).

**(B)** Surface rendering of top (left) and side (right) views of the yeast 20S proteasome  $\square$ -ring when the 20S proteasome was crystallized by itself (1RYP.pdb) and upon association with PA-26 (1Z7Q.pdb). In the nonassociated state, the  $\square$ -ring N-terminal residues (colored) form an inward collapsed mesh gating entry into the proteasome (left). Upon association with PA-26 (right), the  $\square$ -subunits N-terminal residues flip and project outward into PA-26. The twelve C-terminal residues of PA-26 dock into the periphery of the  $\square$ -subunits pseudoring (colored, right).

Figure: S1

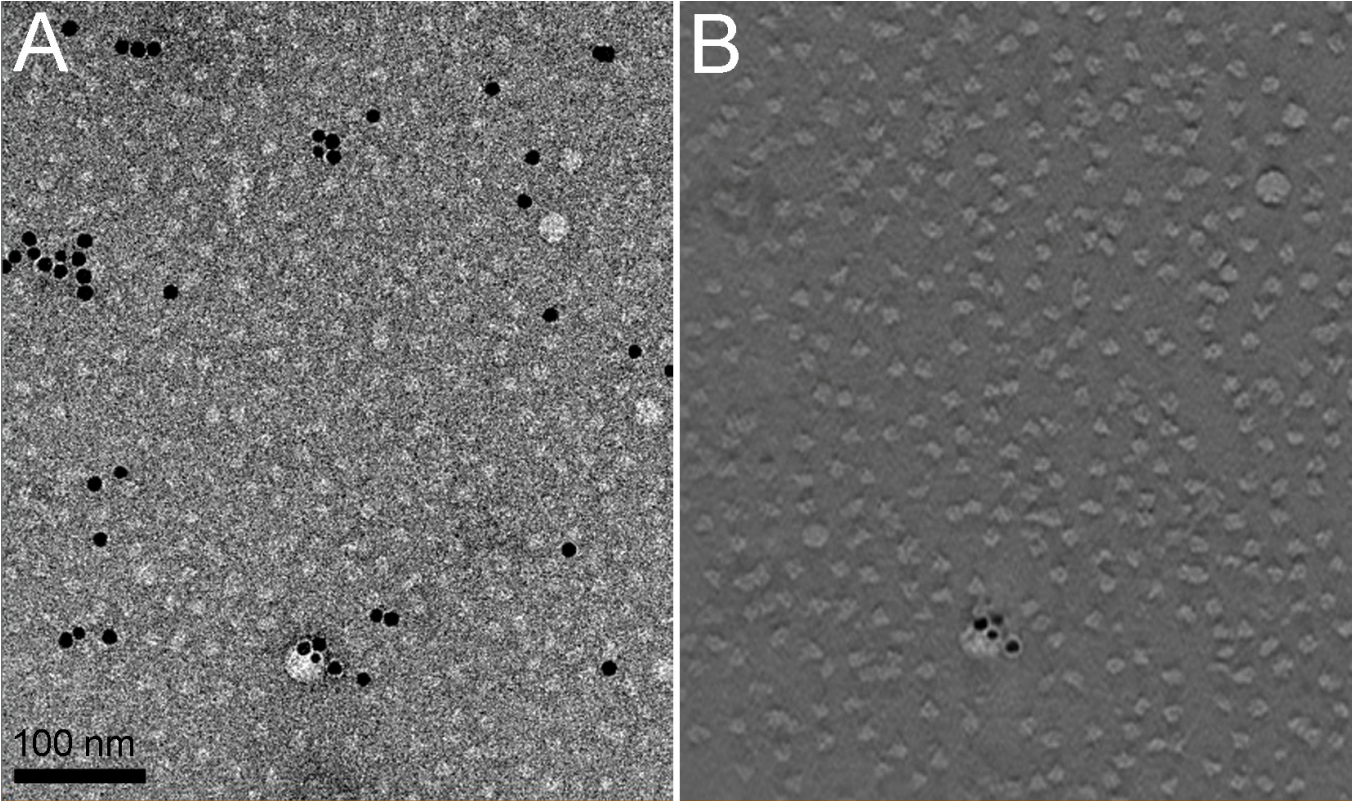

Figure: S2

A

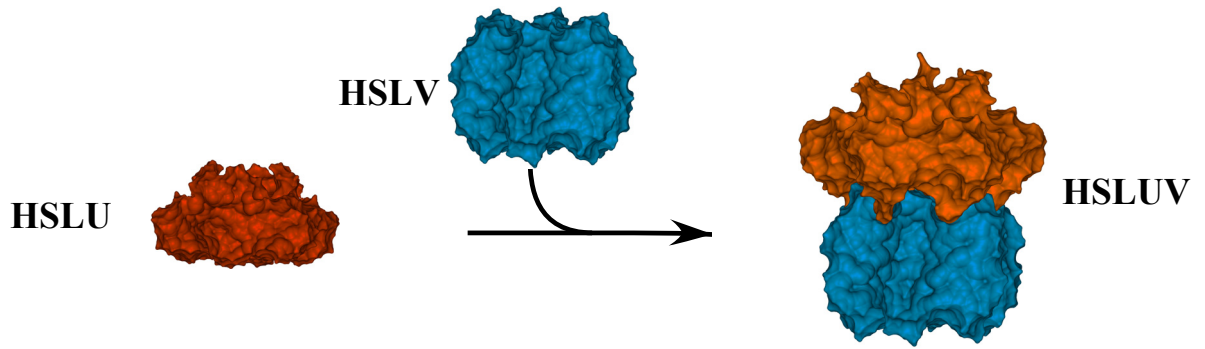

B

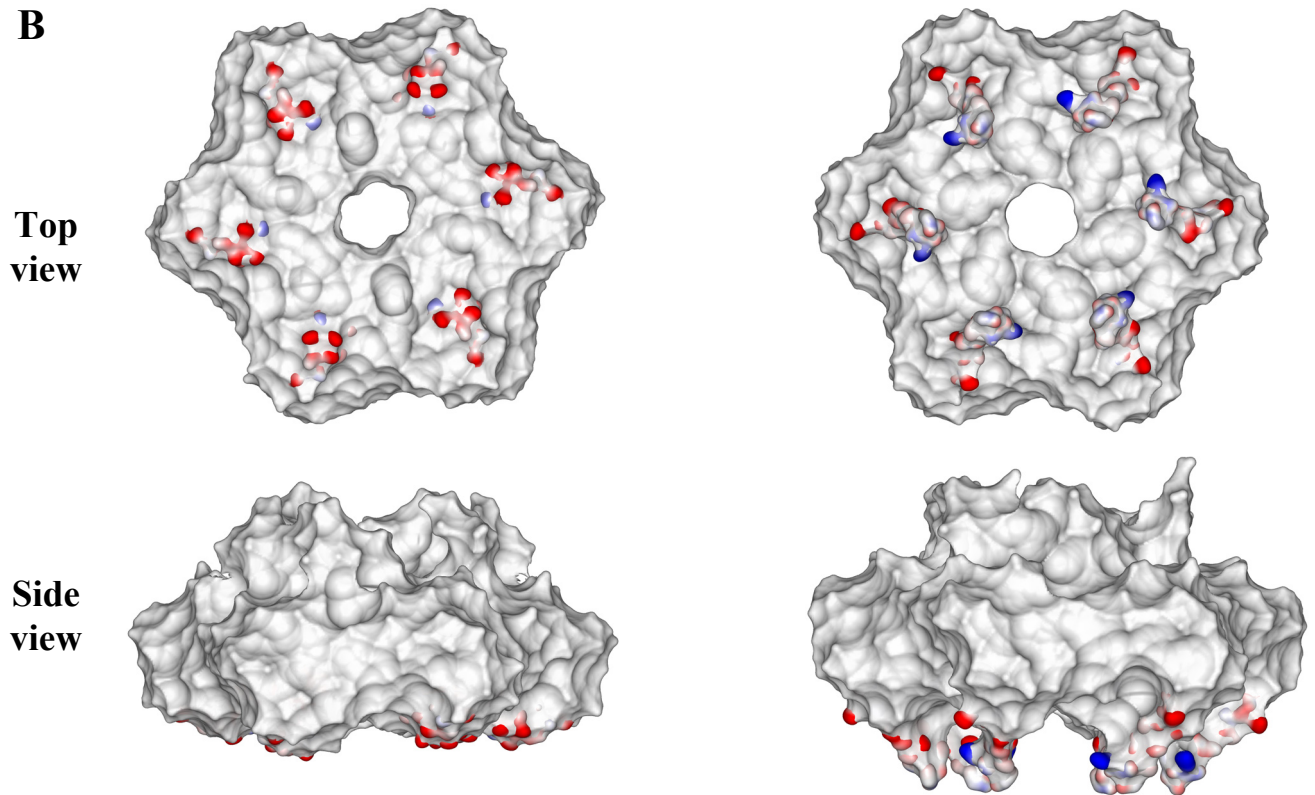

C

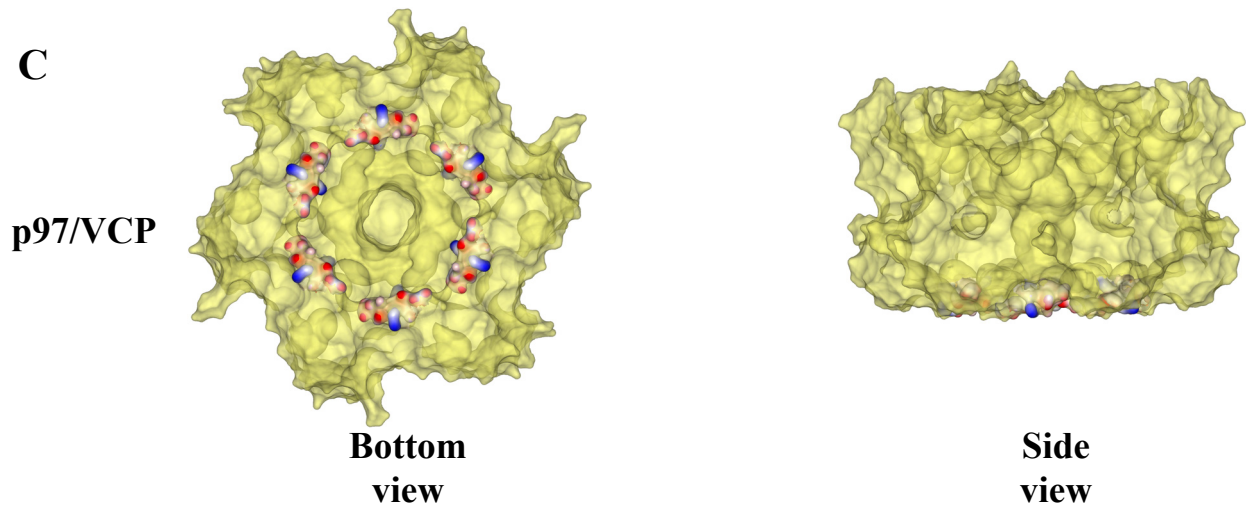

Figure: S3

A

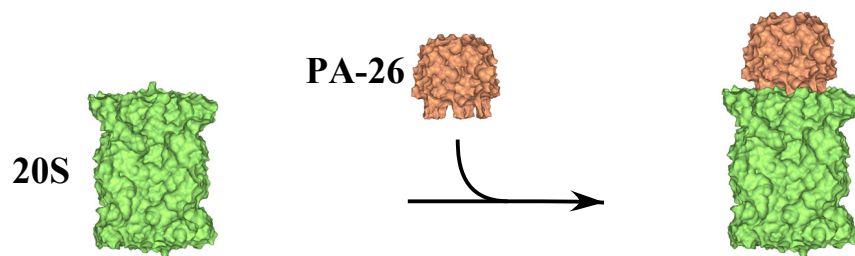

B

Top  
view

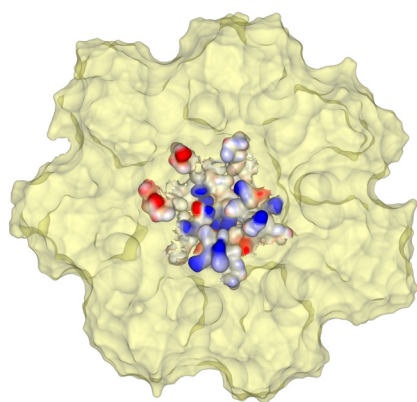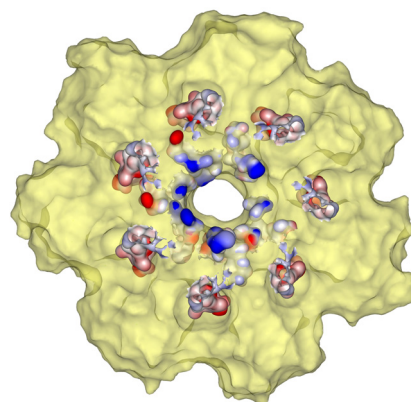

Side  
view

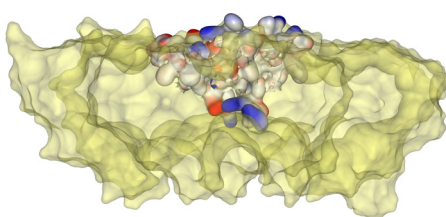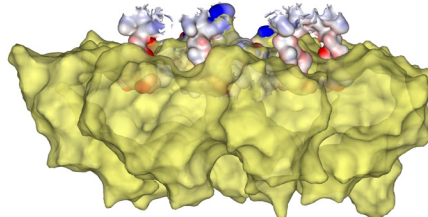

Supplement: supp_M809643200_Suppdata.pdf [file supp_M809643200_Suppdata.pdf]
